# Supplementary material for: Preparation and characterization of a PFSA–PVDF blend nanofiber membrane and its preliminary application investigation
Source: Royal Society of Chemistry journal article supplement (doi:10.1039/c7nj01555k), 2017-01-01
Supplement: c7nj01555k1.pdf [file c7nj01555k1.pdf]

Supporting information:

## Preparation and characterization of PFSA-PVDFblend nanofiber membrane and its preliminary application investigation

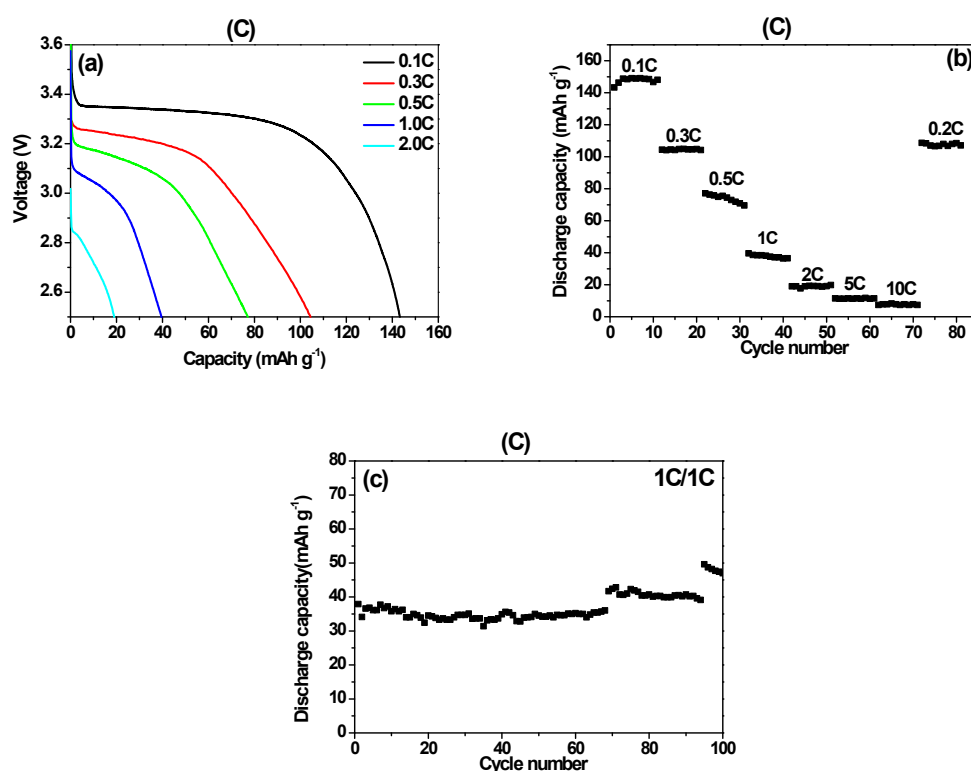

**Figure 1.** (a) The C-rate capacity of cells, which was assembled with  $\text{LiFePO}_4$  cathode and lithium anode, containing the PFSA-PVDF (4:1) based separator. (b) The discharged C-rate capacity (the charge current is 0.1 C). (d) The discharge capacity of cells containing the PFSA-PVDF (C) based separator as a function of cycle number at 1 C with charging current rate of 1 C.

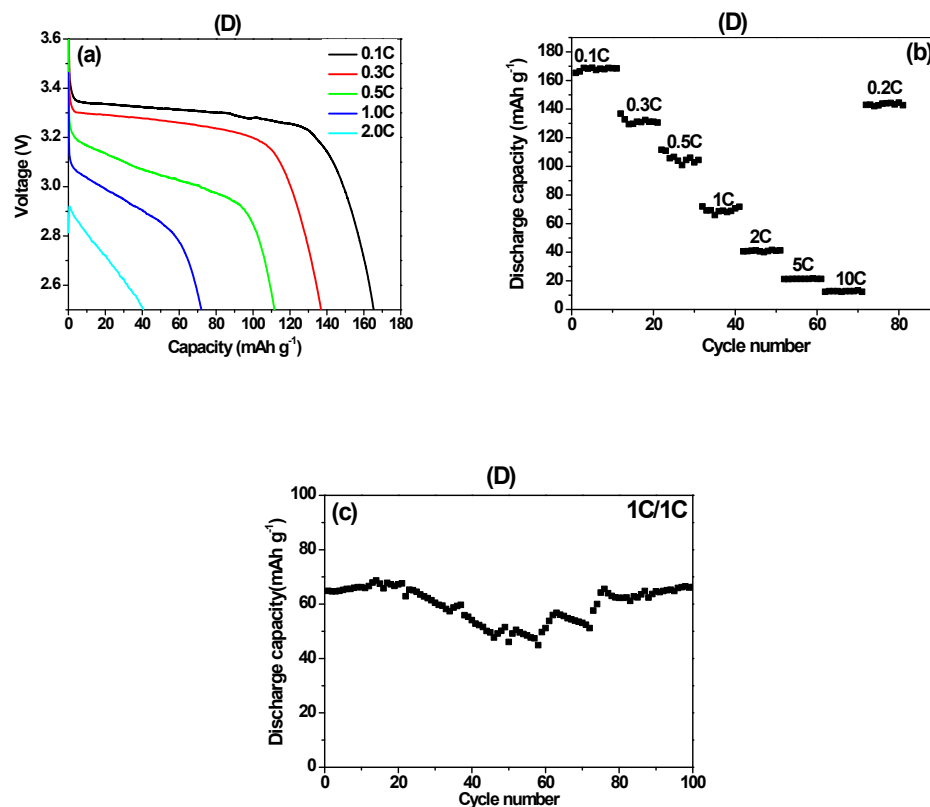

**Figure 2.** (a) The C-rate capacity of cells, which was assembled with  $\text{LiFePO}_4$  cathode and lithium anode, containing the PFSA-PVDF (9:1) based separator. (b) The discharged C-rate capacity (the charge current is 0.1 C). (d) The discharge capacity of cells containing the PFSA-PVDF (D) based separator as a function of cycle number at 1 C with charging current rate of 1 C.
